# Supplementary material
Source: ML conference proceedings conference paper supplement (https://openaccess.thecvf.com/content/WACV2025/html/Raja_Treading_Towards_Privacy-Preserving_WACV_2025_paper.html)
Supplement: Supplementary file 1 [file Raja_Treading_Towards_Privacy-Preserving_WACV_2025_supplemental.pdf]

# Supplementary: Treading Towards Privacy-Preserving Table Structure Recognition

Sachin Raja  
IIIT Hyderabad

sachin.raja@research.iiit.ac.in

Ajoy Mondal  
IIIT Hyderabad

ajoy.mondal@iiit.ac.in

C V Jawahar  
IIIT Hyderabad

jawahar@iiit.ac.in

## 1. Dataset Preprocessing

Our model for cell detection is trained on the FinTab-Net dataset, which initially provides bounding boxes around cell content. To transform this dataset into one with cell-level coordinates, we implement a preprocessing step. This involves determining the minimum and maximum x and y coordinates for each row and column based on the content boxes. Subsequently, we refine the coordinates by splitting the y-coordinate difference between adjacent rows by half. This extends the maximum y end coordinate of the preceding row while reducing the minimum y-coordinate of the current row. Similarly, we split the x-coordinate difference between adjacent columns by half, extending the maximum x end coordinate of the previous column and reducing the minimum x-coordinate of the current column. This processing ensures that our dataset adheres to all constraints relevant to our modeling approach. Figure 1 visualizes the steps.

## 2. Postprocessing Cell Detection Output

Following the identification of table cell bounding boxes and the prediction of row/column adjacency matrices, the subsequent task is to establish row and column spans for each cell, facilitating the reconstruction of the table’s structure. Our post-processing algorithm, an extension of previously proposed methodologies [1, 2], integrates word/token bounding boxes extracted through OCR tools to refine cell boxes and enhance structural recognition. The algorithm entails several steps, including the removal of table cells with heights below 60 percent of the average height of predicted cells, the identification and exclusion of incorrectly predicted cells based on various loss weight values and overlap considerations, and the definition of functions for calculating overlap and containment between cell pairs. Additionally, the algorithm involves sorting all table cells based on their x-end coordinates and iterating through them to assign column indices, considering overlapping cells and applying threshold criteria. Ultimately, the resulting columns list for each cell aids in determining the start and

|                                               | Options (in thousands) | Wtd. Avg. Exercise Price | Wtd. Avg. Remaining Contractual Term (in years) | Aggregate Intrinsic Value (dollars in millions) |
|-----------------------------------------------|------------------------|--------------------------|-------------------------------------------------|-------------------------------------------------|
| Outstanding at April 25, 2014                 | 35,577                 | \$ 44.78                 |                                                 |                                                 |
| Granted                                       | 40,952                 | 57.96                    |                                                 |                                                 |
| Exercised                                     | (13,503)               | 45.32                    |                                                 |                                                 |
| Expired/Forfeited                             | (1,005)                | 50.43                    |                                                 |                                                 |
| Outstanding at April 24, 2015                 | 62,021                 | 53.27                    | 7.03                                            | \$ 1,351                                        |
| Vested and expected to vest at April 24, 2015 | 55,649                 | 51.27                    | 6.75                                            | 1,314                                           |
| Exercisable at April 24, 2015                 | 28,272                 | 39.91                    | 4.53                                            | 981                                             |

(a) Original Table Image

|                                               | Options (in thousands) | Wtd. Avg. Exercise Price | Wtd. Avg. Remaining Contractual Term (in years) | Aggregate Intrinsic Value (dollars in millions) |
|-----------------------------------------------|------------------------|--------------------------|-------------------------------------------------|-------------------------------------------------|
| Outstanding at April 25, 2014                 | 35,577                 | \$ 44.78                 |                                                 |                                                 |
| Granted                                       | 40,952                 | 57.96                    |                                                 |                                                 |
| Exercised                                     | (13,503)               | 45.32                    |                                                 |                                                 |
| Expired/Forfeited                             | (1,005)                | 50.43                    |                                                 |                                                 |
| Outstanding at April 24, 2015                 | 62,021                 | 53.27                    | 7.03                                            | \$ 1,351                                        |
| Vested and expected to vest at April 24, 2015 | 55,649                 | 51.27                    | 6.75                                            | 1,314                                           |
| Exercisable at April 24, 2015                 | 28,272                 | 39.91                    | 4.53                                            | 981                                             |

(b) Original Cell Annotations

|                                               | Options (in thousands) | Wtd. Avg. Exercise Price | Wtd. Avg. Remaining Contractual Term (in years) | Aggregate Intrinsic Value (dollars in millions) |
|-----------------------------------------------|------------------------|--------------------------|-------------------------------------------------|-------------------------------------------------|
| Outstanding at April 25, 2014                 | 35,577                 | \$ 44.78                 |                                                 |                                                 |
| Granted                                       | 40,952                 | 57.96                    |                                                 |                                                 |
| Exercised                                     | (13,503)               | 45.32                    |                                                 |                                                 |
| Expired/Forfeited                             | (1,005)                | 50.43                    |                                                 |                                                 |
| Outstanding at April 24, 2015                 | 62,021                 | 53.27                    | 7.03                                            | \$ 1,351                                        |
| Vested and expected to vest at April 24, 2015 | 55,649                 | 51.27                    | 6.75                                            | 1,314                                           |
| Exercisable at April 24, 2015                 | 28,272                 | 39.91                    | 4.53                                            | 981                                             |

(c) Intermediate Annotations

|                                               | Options (in thousands) | Wtd. Avg. Exercise Price | Wtd. Avg. Remaining Contractual Term (in years) | Aggregate Intrinsic Value (dollars in millions) |
|-----------------------------------------------|------------------------|--------------------------|-------------------------------------------------|-------------------------------------------------|
| Outstanding at April 25, 2014                 | 35,577                 | \$ 44.78                 |                                                 |                                                 |
| Granted                                       | 40,952                 | 57.96                    |                                                 |                                                 |
| Exercised                                     | (13,503)               | 45.32                    |                                                 |                                                 |
| Expired/Forfeited                             | (1,005)                | 50.43                    |                                                 |                                                 |
| Outstanding at April 24, 2015                 | 62,021                 | 53.27                    | 7.03                                            | \$ 1,351                                        |
| Vested and expected to vest at April 24, 2015 | 55,649                 | 51.27                    | 6.75                                            | 1,314                                           |
| Exercisable at April 24, 2015                 | 28,272                 | 39.91                    | 4.53                                            | 981                                             |

(d) Final Preprocessed Annotations

Figure 1. Visualization of the Annotation Preprocessing steps to ensure alignment and continuity

end column indices, contributing to the comprehensive reconstruction of the table’s layout.

Similarly, two functions are defined to calculate overlap and containment for cell pairs along the vertical direction, using ratios of intersecting line segment lengths. The sub-

sequent steps involve sorting all table cells based on their y-end coordinates and addressing the challenge of multi-row spanning cells by initializing empty lists for each cell and setting the current row index to zero. The iterative process involves identifying overlapping cells for each cell, updating the rows list based on specific criteria, and incrementing the row index accordingly. The resultant rows list facilitates the determination of start and end row indices for every cell.

Moving on to the smoothing and fine-tuning phase, row and column indices, along with bounding boxes, are utilized to align start and end coordinates. For columns, the process involves extracting minimum start-x coordinates and maximum end-x coordinates, dividing the gap equally among adjacent cells to ensure adherence to continuity, alignment, and non-overlapping constraints. The algorithm further leverages an OCR tool, such as Tesseract [3], for pre-processing the table image and obtaining word/token-level bounding boxes. The final step involves refining the predicted cell bounding boxes using token bounding boxes, computing overlapping areas, assigning them to the highest overlapping cell, and adjusting cell boundaries along both x and y directions to fully encapsulate the content. This meticulous approach notably enhances detection performance, particularly at higher Intersection over Union (IoU) threshold values.

### 3. Optimization Behavior

Figures 2, 3, 4, 5 and 6 compare optimization behaviors of using Table Grid Approximator (TGA) vs Region Proposal Network (RPN) on classification, bounding-box regression, alignment, row-continuity and column-continuity losses respectively. Consistently across all five loss types, it is evident that using TGA allows for optimization to a lower loss value in a lesser time as compared to using RPN.

### 4. Distribution of Anchor Boxes

As opposed to a fix number of anchors set as 20,000, using TGA allows dynamically generated anchors which depend on the approximated grid size of the image. Figure 7 shows the probability distribution of text contours, grid cells and anchors respectively on linear as well as log scale. The graphs show that TGA allows for significantly reduced number of anchors on average as opposed to a fixed number of 20,000.

### 5. Annotation Errors in FinTabNet Train

Figures 8 through 12 demonstrate some erroneously annotated images in the FinTabNet-Train dataset.

## 6. Qualitative Examples

Figures 13 through 24 demonstrate near-perfect structure prediction on dense tables as well as those containing empty cells.

### 6.1. Success Cases

### 6.2. Failure Cases

Figures 25 through 28 demonstrate a few failure cases, which despite being predicted incorrectly are not very far from the ground truth.

### 6.3. Errors in Annotations in FinTabNet-Test

Figures 29 through 31 demonstrate some examples on FinTabNet-Test dataset, which despite having incorrect annotations, were predicted accurately by our solution. This further demonstrates the robustness of TabGuard.

## References

- [1] Sachin Raja, Ajoy Mondal, and CV Jawahar. Visual understanding of complex table structures from document images. In *Proceedings of the IEEE/CVF Winter Conference on Applications of Computer Vision (WACV)*, pages 2299–2308, 2022. 1
- [2] Sachin Raja, Ajoy Mondal, and C. V. Jawahar. Table structure recognition using top-down and bottom-up cues. In *European Conference on Computer Vision (ECCV)*, pages 70–86, 2020. 1
- [3] Ray Smith. An overview of the Tesseract OCR engine. In *ICDAR*, 2007. 2
- [4] Xinyi Zheng, Douglas Burdick, Lucian Popa, Xu Zhong, and Nancy Xin Ru Wang. Global Table Extractor (GTE): A framework for joint table identification and cell structure recognition using visual context. In *Proceedings of the IEEE/CVF Winter Conference on Applications of Computer Vision (WACV)*, pages 697–706, 2021. 5, 6, 7, 8, 9, 10, 11, 12, 13, 14

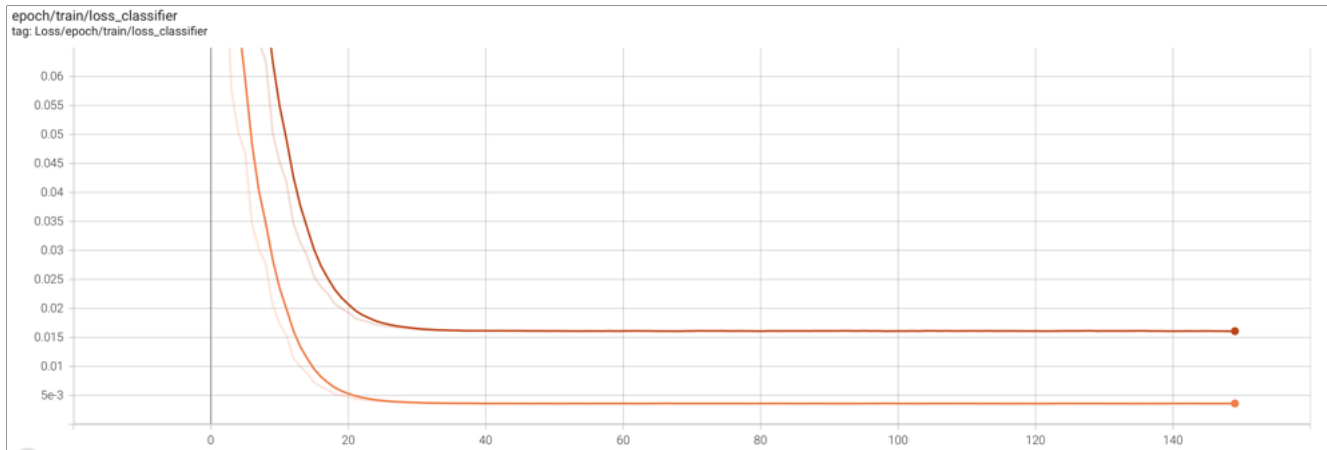

Figure 2. Optimization behavior for the classification loss. Orange curve represents loss using Table Grid Approximator (TGA) instead of Region Proposal Network (RPN), while the red curve represents loss using RPN instead of TGA.

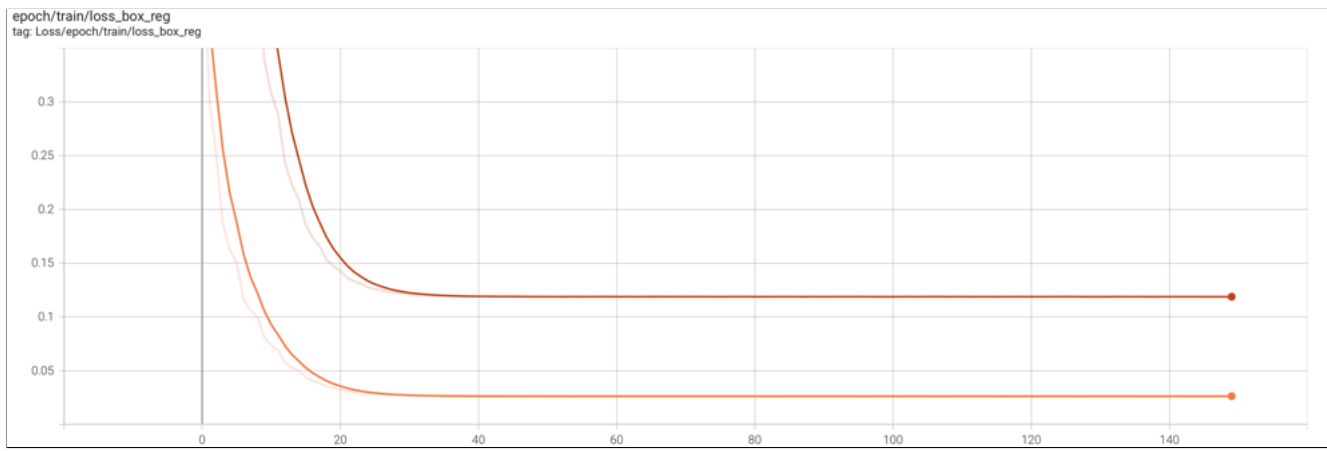

Figure 3. Optimization behavior for the bounding box regression loss. Orange curve represents loss using Table Grid Approximator (TGA) instead of Region Proposal Network (RPN), while the red curve represents loss using RPN instead of TGA.

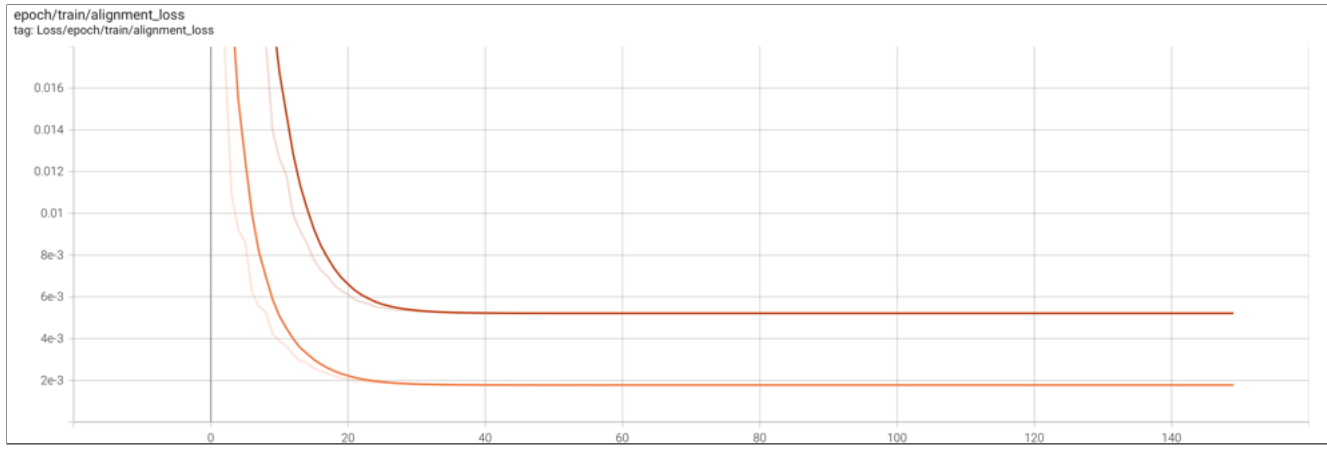

Figure 4. Optimization behavior for the alignment loss. Orange curve represents loss using Table Grid Approximator (TGA) instead of Region Proposal Network (RPN), while the red curve represents loss using RPN instead of TGA.

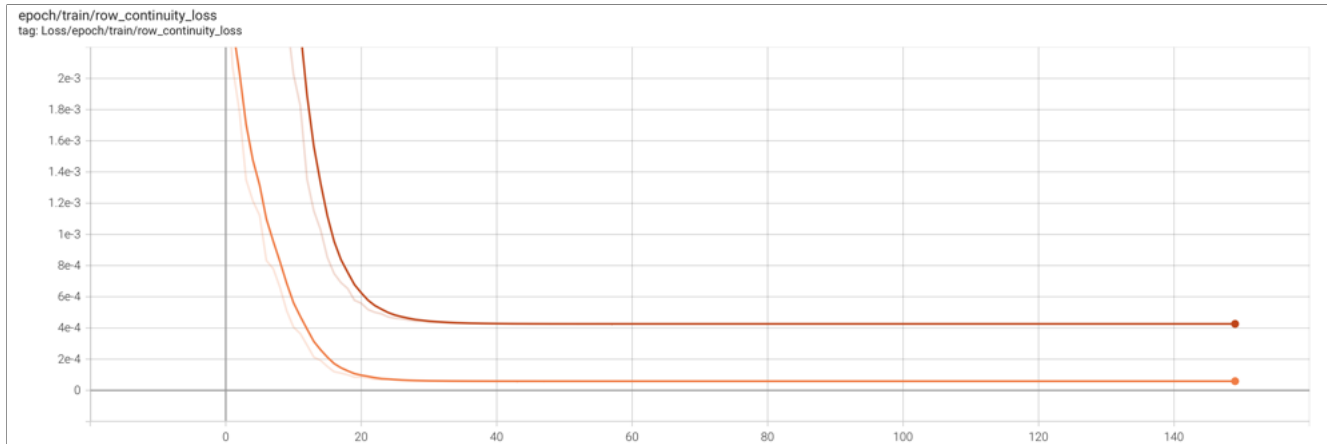

Figure 5. Optimization behavior for the row continuity loss. Orange curve represents loss using Table Grid Approximator (TGA) instead of Region Proposal Network (RPN), while the red curve represents loss using RPN instead of TGA.

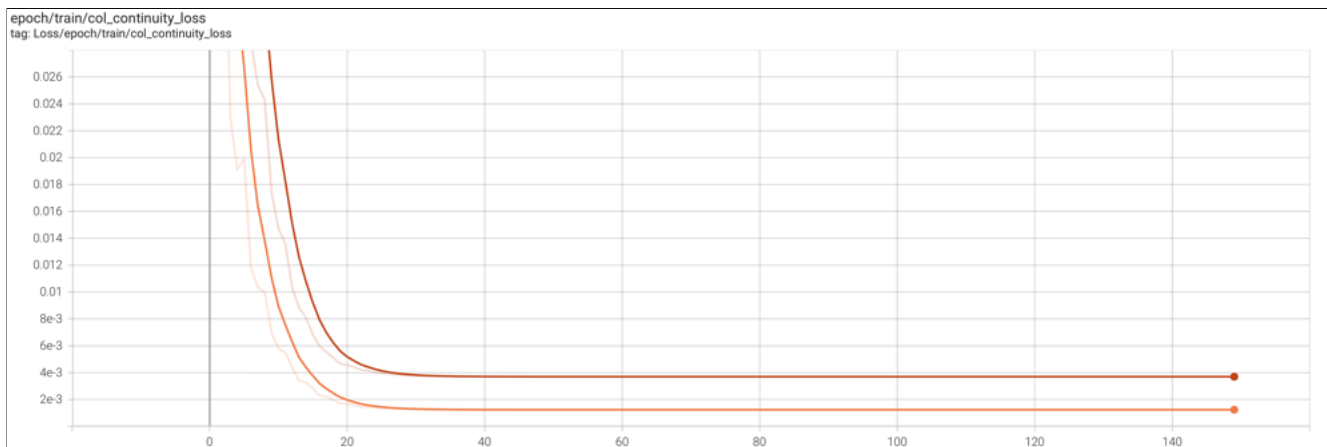

Figure 6. Optimization behavior for the column continuity loss. Orange curve represents loss using Table Grid Approximator (TGA) instead of Region Proposal Network (RPN), while the red curve represents loss using RPN instead of TGA.

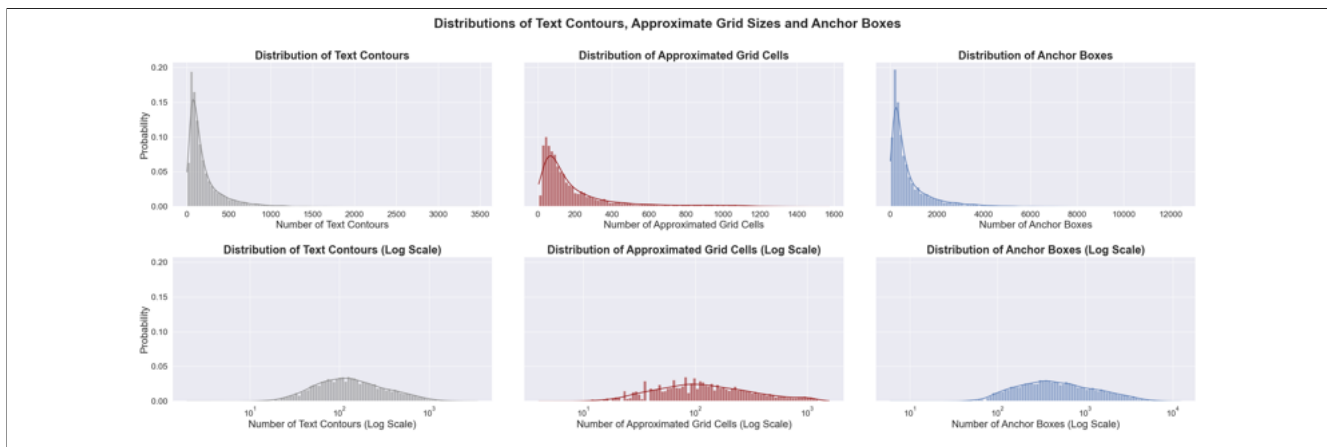

Figure 7. Distributions of text contours, table grid cells and generated anchors. X-axes denote the counts of contours, cells, and anchors respectively, while Y-axis denotes probability of occurrence. Row 1 is on linear scale while Row 2 is on the log scale. It is clear that text contours, grid cells and anchor boxes all follow log-linear distributions.

Figure 8. An example of file from Fintabnet-train [4] dataset which is incorrectly annotated. Reading order of images proceeds from left to right and then to the next row. First image shows the original image, second image shows the original annotation, third image shows the intermediate step of annotation preprocessing, and fourth image shows the preprocessed annotation.

Figure 9. An example of file from Fintabnet-train [4] dataset which is incorrectly annotated. Reading order of images proceeds from left to right and then to the next row. First image shows the original image, second image shows the original annotation, third image shows the intermediate step of annotation preprocessing, and fourth image shows the preprocessed annotation.

| (1) Financial Statements                                                                                 | Page No. | (1) Financial Statements                                                                                 | Page No. |
|----------------------------------------------------------------------------------------------------------|----------|----------------------------------------------------------------------------------------------------------|----------|
| (a) Report of Independent Registered Public Accounting Firm                                              | 77       | (a) Report of Independent Registered Public Accounting Firm                                              | 77       |
| (b) Consolidated Statements of Income for the years ended December 31, 2014, 2013 and 2012               | 78       | (b) Consolidated Statements of Income for the years ended December 31, 2014, 2013 and 2012               | 78       |
| (c) Consolidated Statements of Comprehensive Income for the years ended December 31, 2014, 2013 and 2012 | 79       | (c) Consolidated Statements of Comprehensive Income for the years ended December 31, 2014, 2013 and 2012 | 79       |
| (d) Consolidated Balance Sheets as of December 31, 2014 and 2013                                         | 80-81    | (d) Consolidated Balance Sheets as of December 31, 2014 and 2013                                         | 80-81    |
| (e) Consolidated Statements of Cash Flows for the years ended December 31, 2014, 2013 and 2012           | 83       | (e) Consolidated Statements of Cash Flows for the years ended December 31, 2014, 2013 and 2012           | 83       |
| (f) Consolidated Statements of Shareholder's Equity for the years ended December 31, 2014, 2013 and 2012 | 84-85    | (f) Consolidated Statements of Shareholder's Equity for the years ended December 31, 2014, 2013 and 2012 | 84-85    |
| (g) Notes to Consolidated Financial Statements                                                           | 86-135   | (g) Notes to Consolidated Financial Statements                                                           | 86-135   |
| (2) Financial Statements Schedules                                                                       |          | (2) Financial Statements Schedules                                                                       |          |
| All schedules have been omitted because of the absence of conditions under which they are required.      |          | All schedules have been omitted because of the absence of conditions under which they are required.      |          |

  

| (1) Financial Statements                                                                                 | Page No. | (1) Financial Statements                                                                                 | Page No. |
|----------------------------------------------------------------------------------------------------------|----------|----------------------------------------------------------------------------------------------------------|----------|
| (a) Report of Independent Registered Public Accounting Firm                                              | 77       | (a) Report of Independent Registered Public Accounting Firm                                              | 77       |
| (b) Consolidated Statements of Income for the years ended December 31, 2014, 2013 and 2012               | 78       | (b) Consolidated Statements of Income for the years ended December 31, 2014, 2013 and 2012               | 78       |
| (c) Consolidated Statements of Comprehensive Income for the years ended December 31, 2014, 2013 and 2012 | 79       | (c) Consolidated Statements of Comprehensive Income for the years ended December 31, 2014, 2013 and 2012 | 79       |
| (d) Consolidated Balance Sheets as of December 31, 2014 and 2013                                         | 80-81    | (d) Consolidated Balance Sheets as of December 31, 2014 and 2013                                         | 80-81    |
| (e) Consolidated Statements of Cash Flows for the years ended December 31, 2014, 2013 and 2012           | 83       | (e) Consolidated Statements of Cash Flows for the years ended December 31, 2014, 2013 and 2012           | 83       |
| (f) Consolidated Statements of Shareholder's Equity for the years ended December 31, 2014, 2013 and 2012 | 84-85    | (f) Consolidated Statements of Shareholder's Equity for the years ended December 31, 2014, 2013 and 2012 | 84-85    |
| (g) Notes to Consolidated Financial Statements                                                           | 86-135   | (g) Notes to Consolidated Financial Statements                                                           | 86-135   |
| (2) Financial Statements Schedules                                                                       |          | (2) Financial Statements Schedules                                                                       |          |
| All schedules have been omitted because of the absence of conditions under which they are required.      |          | All schedules have been omitted because of the absence of conditions under which they are required.      |          |

Figure 10. An example of file from Fintabnet-train [4] dataset which is incorrectly annotated. Reading order of images proceeds from left to right and then to the next row. First image shows the original image, second image shows the original annotation, third image shows the intermediate step of annotation preprocessing, and fourth image shows the preprocessed annotation.

| (1) Financial Statements                                                                                                          | Page No. | (1) Financial Statements                                                                                                          | Page No. |
|-----------------------------------------------------------------------------------------------------------------------------------|----------|-----------------------------------------------------------------------------------------------------------------------------------|----------|
| (a) Reports of Independent Registered Public Accounting Firms                                                                     | 67-68    | (a) Reports of Independent Registered Public Accounting Firms                                                                     | 67-68    |
| (b) Consolidated Statements of Income for the years ended December 31, 2008, 2007 and 2006                                        | 69       | (b) Consolidated Statements of Income for the years ended December 31, 2008, 2007 and 2006                                        | 69       |
| (c) Consolidated Balance Sheets as of December 31, 2008 and 2007                                                                  | 70-71    | (c) Consolidated Balance Sheets as of December 31, 2008 and 2007                                                                  | 70-71    |
| (d) Consolidated Statements of Cash Flows for the years ended December 31, 2008, 2007 and 2006                                    | 73       | (d) Consolidated Statements of Cash Flows for the years ended December 31, 2008, 2007 and 2006                                    | 73       |
| (e) Consolidated Statements of Shareholders' Equity and Comprehensive Income for the years ended December 31, 2008, 2007 and 2006 | 74-75    | (e) Consolidated Statements of Shareholders' Equity and Comprehensive Income for the years ended December 31, 2008, 2007 and 2006 | 74-75    |
| (f) Notes to Consolidated Financial Statements                                                                                    | 76-117   | (f) Notes to Consolidated Financial Statements                                                                                    | 76-117   |

  

| (1) Financial Statements                                                                                                          | Page No. | (1) Financial Statements                                                                                                          | Page No. |
|-----------------------------------------------------------------------------------------------------------------------------------|----------|-----------------------------------------------------------------------------------------------------------------------------------|----------|
| (a) Reports of Independent Registered Public Accounting Firms                                                                     | 67-68    | (a) Reports of Independent Registered Public Accounting Firms                                                                     | 67-68    |
| (b) Consolidated Statements of Income for the years ended December 31, 2008, 2007 and 2006                                        | 69       | (b) Consolidated Statements of Income for the years ended December 31, 2008, 2007 and 2006                                        | 69       |
| (c) Consolidated Balance Sheets as of December 31, 2008 and 2007                                                                  | 70-71    | (c) Consolidated Balance Sheets as of December 31, 2008 and 2007                                                                  | 70-71    |
| (d) Consolidated Statements of Cash Flows for the years ended December 31, 2008, 2007 and 2006                                    | 73       | (d) Consolidated Statements of Cash Flows for the years ended December 31, 2008, 2007 and 2006                                    | 73       |
| (e) Consolidated Statements of Shareholders' Equity and Comprehensive Income for the years ended December 31, 2008, 2007 and 2006 | 74-75    | (e) Consolidated Statements of Shareholders' Equity and Comprehensive Income for the years ended December 31, 2008, 2007 and 2006 | 74-75    |
| (f) Notes to Consolidated Financial Statements                                                                                    | 76-117   | (f) Notes to Consolidated Financial Statements                                                                                    | 76-117   |

Figure 11. An example of file from Fintabnet-train [4] dataset which is incorrectly annotated. Reading order of images proceeds from left to right and then to the next row. First image shows the original image, second image shows the original annotation, third image shows the intermediate step of annotation preprocessing, and fourth image shows the preprocessed annotation.

| Notes Issued (in millions) | Maturity Date     | Interest Rate                                                                  | Interest Payment Dates                                                           |
|----------------------------|-------------------|--------------------------------------------------------------------------------|----------------------------------------------------------------------------------|
| \$ 750                     | May 18, 2016      | Variable; three-month U.S. dollar LIBOR, reset quarterly, plus 45 basis points | February 18, May 18, August 18, and November 18; commencing on February 18, 2015 |
| 750                        | November 17, 2017 | Fixed 1.750%                                                                   | May 17 and November 17; commencing on May 17, 2015                               |
| 1,250                      | November 18, 2019 | Fixed 2.700%                                                                   | May 18 and November 18; commencing on May 18, 2015                               |
| 1,250                      | November 18, 2021 | Fixed 3.300%                                                                   | May 18 and November 18; commencing on May 18, 2015                               |
| 2,000                      | November 18, 2024 | Fixed 3.800%                                                                   | May 18 and November 18; commencing on May 18, 2015                               |
| 500                        | November 18, 2034 | Fixed 4.500%                                                                   | May 18 and November 18; commencing on May 18, 2015                               |
| 1,500                      | November 18, 2044 | Fixed 4.800%                                                                   | May 18 and November 18; commencing on May 18, 2015                               |
| <b>\$8,000</b>             |                   |                                                                                |                                                                                  |

  

| Notes Issued (in millions) | Maturity Date     | Interest Rate                                                                  | Interest Payment Dates                                                           |
|----------------------------|-------------------|--------------------------------------------------------------------------------|----------------------------------------------------------------------------------|
| \$ 750                     | May 18, 2016      | Variable; three-month U.S. dollar LIBOR, reset quarterly, plus 45 basis points | February 18, May 18, August 18, and November 18; commencing on February 18, 2015 |
| 750                        | November 17, 2017 | Fixed 1.750%                                                                   | May 17 and November 17; commencing on May 17, 2015                               |
| 1,250                      | November 18, 2019 | Fixed 2.700%                                                                   | May 18 and November 18; commencing on May 18, 2015                               |
| 1,250                      | November 18, 2021 | Fixed 3.300%                                                                   | May 18 and November 18; commencing on May 18, 2015                               |
| 2,000                      | November 18, 2024 | Fixed 3.800%                                                                   | May 18 and November 18; commencing on May 18, 2015                               |
| 500                        | November 18, 2034 | Fixed 4.500%                                                                   | May 18 and November 18; commencing on May 18, 2015                               |
| 1,500                      | November 18, 2044 | Fixed 4.800%                                                                   | May 18 and November 18; commencing on May 18, 2015                               |
| <b>\$8,000</b>             |                   |                                                                                |                                                                                  |

Figure 12. An example of file from Fintabnet-train [4] dataset which is incorrectly annotated. Reading order of images proceeds from left to right and then to the next row. First image shows the original image, second image shows the original annotation, third image shows the intermediate step of annotation preprocessing, and fourth image shows the preprocessed annotation.

| Millions of dollars and shares except per share data                                                          | Year Ended December 31 |           |          |
|---------------------------------------------------------------------------------------------------------------|------------------------|-----------|----------|
|                                                                                                               | 2008                   | 2007      | 2006     |
| <b>Revenue:</b>                                                                                               |                        |           |          |
| Services                                                                                                      | \$ 13,391              | \$ 11,256 | \$ 9,643 |
| Product sales                                                                                                 | 4,888                  | 4,008     | 3,312    |
| Total revenue                                                                                                 | 18,279                 | 15,264    | 12,955   |
| <b>Operating costs and expenses:</b>                                                                          |                        |           |          |
| Cost of services                                                                                              | 10,079                 | 8,167     | 6,751    |
| Cost of sales                                                                                                 | 3,970                  | 3,358     | 2,873    |
| General and administrative                                                                                    | 282                    | 293       | 342      |
| Gain on sale of business assets, net                                                                          | (82)                   | (52)      | (78)     |
| Total operating costs and expenses                                                                            | 14,269                 | 11,766    | 9,788    |
| Operating income                                                                                              | 4,010                  | 3,498     | 3,243    |
| Interest expense                                                                                              | (190)                  | (154)     | (163)    |
| Interest income                                                                                               | 39                     | 124       | 128      |
| Other, net                                                                                                    | (738)                  | (8)       | (10)     |
| Income from continuing operations before income taxes and minority interest                                   | 3,163                  | 3,460     | 3,199    |
| Provision for income taxes                                                                                    | (1,213)                | (907)     | (1,060)  |
| Minority interest in net income of subsidiaries                                                               | 9                      | (29)      | (18)     |
| Income from continuing operations                                                                             | 1,961                  | 2,524     | 2,117    |
| Income (loss) from discontinued operations, net of income tax (provision) benefit of \$3, \$0.15, and \$(183) | (423)                  | 975       | 171      |
| Net income                                                                                                    | \$ 1,538               | \$ 3,499  | \$ 2,288 |
| <b>Basic income (loss) per share:</b>                                                                         |                        |           |          |
| Income from continuing operations                                                                             | \$ 2.24                | \$ 2.76   | \$ 2.13  |
| Income (loss) from discontinued operations, net                                                               | (0.49)                 | 1.07      | 0.16     |
| Net income per share                                                                                          | \$ 1.75                | \$ 3.83   | \$ 2.31  |
| <b>Diluted income (loss) per share:</b>                                                                       |                        |           |          |
| Income from continuing operations                                                                             | \$ 2.17                | \$ 2.68   | \$ 2.07  |
| Income (loss) from discontinued operations, net                                                               | (0.47)                 | 1.02      | 0.16     |
| Net income per share                                                                                          | \$ 1.70                | \$ 3.68   | \$ 2.23  |
| Basic weighted average common shares outstanding                                                              | 877                    | 913       | 1,014    |
| Diluted weighted average common shares outstanding                                                            | 904                    | 950       | 1,054    |

Figure 13. An example of file from Fintabnet-test [4] dataset. Reading order of images proceeds from left to right and then to the next row. First image shows the original annotation, second image shows the masked image, third image shows the approximated table grid, and fourth image shows the output of TabGuard.

Figure 14. An example of file from Fintabnet-test [4] dataset. Reading order of images proceeds from left to right and then to the next row. First image shows the original annotation, second image shows the masked image, third image shows the approximated table grid, and fourth image shows the output of TabGuard.

Figure 15. An example of file from Fintabnet-test [4] dataset. Reading order of images proceeds from left to right and then to the next row. First image shows the original annotation, second image shows the masked image, third image shows the approximated table grid, and fourth image shows the output of TabGuard.

Figure 16. An example of file from Fintabnet-test [4] dataset. Reading order of images proceeds from left to right and then to the next row. First image shows the original annotation, second image shows the masked image, third image shows the approximated table grid, and fourth image shows the output of TabGuard.



This figure shows a financial statement with multiple columns and rows. The columns represent different financial metrics, and the rows represent different categories. The data is presented in a structured format, with some cells containing redacted information.

Figure 17. An example of file from Fintabnet-test [4] dataset. Reading order of images proceeds from left to right and then to the next row. First image shows the original annotation, second image shows the masked image, third image shows the approximated table grid, and fourth image shows the output of TabGuard.

This figure shows a financial statement with multiple columns and rows. The columns represent different financial metrics, and the rows represent different categories. The data is presented in a structured format, with some cells containing redacted information.

Figure 18. An example of file from Fintabnet-test [4] dataset. Reading order of images proceeds from left to right and then to the next row. First image shows the original annotation, second image shows the masked image, third image shows the approximated table grid, and fourth image shows the output of TabGuard.

This figure shows a financial statement with multiple columns and rows. The columns represent different financial metrics, and the rows represent different categories. The data is presented in a structured format, with some cells containing redacted information.

Figure 19. An example of file from Fintabnet-test [4] dataset. Reading order of images proceeds from left to right and then to the next row. First image shows the original annotation, second image shows the masked image, third image shows the approximated table grid, and fourth image shows the output of TabGuard.

| Table Number | Description                                                                                                                                                                                                                                                   | Table | Description | Table | Description                                                                                                                                                                                                                                                   |
|--------------|---------------------------------------------------------------------------------------------------------------------------------------------------------------------------------------------------------------------------------------------------------------|-------|-------------|-------|---------------------------------------------------------------------------------------------------------------------------------------------------------------------------------------------------------------------------------------------------------------|
| 3.1          | Annual Certificate of Incorporation filed as an Exhibit to the Company's report on Form S-8, filed on August 18, 2011, and incorporated herein by reference. (Commission File Number 333-171112)                                                              |       |             | 3.1   | Annual Certificate of Incorporation filed as an Exhibit to the Company's report on Form S-8, filed on August 18, 2011, and incorporated herein by reference. (Commission File Number 333-171112)                                                              |
| 3.2          | Amended and Restated By-Laws of the Company filed as an Exhibit to the Company's report on Form S-8, filed on August 18, 2011, and incorporated herein by reference. (Commission File Number 333-171112)                                                      |       |             | 3.2   | Amended and Restated By-Laws of the Company filed as an Exhibit to the Company's report on Form S-8, filed on August 18, 2011, and incorporated herein by reference. (Commission File Number 333-171112)                                                      |
| 3.3          | Form of 1099 Service Note due 2011 filed as an Exhibit to the Company's report on Form S-8, filed on August 18, 2011, and incorporated herein by reference. (Commission File Number 333-171112)                                                               |       |             | 3.3   | Form of 1099 Service Note due 2011 filed as an Exhibit to the Company's report on Form S-8, filed on August 18, 2011, and incorporated herein by reference. (Commission File Number 333-171112)                                                               |
| 3.4          | Form of 1099 Service Note due 2012 filed as an Exhibit to the Company's report on Form S-8, filed on August 18, 2011, and incorporated herein by reference. (Commission File Number 333-171112)                                                               |       |             | 3.4   | Form of 1099 Service Note due 2012 filed as an Exhibit to the Company's report on Form S-8, filed on August 18, 2011, and incorporated herein by reference. (Commission File Number 333-171112)                                                               |
| 3.5          | Form of 1099 Service Note due 2013 filed as an Exhibit to the Company's report on Form S-8, filed on August 18, 2011, and incorporated herein by reference. (Commission File Number 333-171112)                                                               |       |             | 3.5   | Form of 1099 Service Note due 2013 filed as an Exhibit to the Company's report on Form S-8, filed on August 18, 2011, and incorporated herein by reference. (Commission File Number 333-171112)                                                               |
| 3.6          | Form of 1099 Service Note due 2014 filed as an Exhibit to the Company's report on Form S-8, filed on August 18, 2011, and incorporated herein by reference. (Commission File Number 333-171112)                                                               |       |             | 3.6   | Form of 1099 Service Note due 2014 filed as an Exhibit to the Company's report on Form S-8, filed on August 18, 2011, and incorporated herein by reference. (Commission File Number 333-171112)                                                               |
| 3.7          | Form of 1099 Service Note due 2015 filed as an Exhibit to the Company's report on Form S-8, filed on August 18, 2011, and incorporated herein by reference. (Commission File Number 333-171112)                                                               |       |             | 3.7   | Form of 1099 Service Note due 2015 filed as an Exhibit to the Company's report on Form S-8, filed on August 18, 2011, and incorporated herein by reference. (Commission File Number 333-171112)                                                               |
| 3.8          | Form of 1099 Service Note due 2016 filed as an Exhibit to the Company's report on Form S-8, filed on August 18, 2011, and incorporated herein by reference. (Commission File Number 333-171112)                                                               |       |             | 3.8   | Form of 1099 Service Note due 2016 filed as an Exhibit to the Company's report on Form S-8, filed on August 18, 2011, and incorporated herein by reference. (Commission File Number 333-171112)                                                               |
| 3.9          | Form of 1099 Service Note due 2017 filed as an Exhibit to the Company's report on Form S-8, filed on August 18, 2011, and incorporated herein by reference. (Commission File Number 333-171112)                                                               |       |             | 3.9   | Form of 1099 Service Note due 2017 filed as an Exhibit to the Company's report on Form S-8, filed on August 18, 2011, and incorporated herein by reference. (Commission File Number 333-171112)                                                               |
| 3.10         | Form of 1099 Service Note due 2018 filed as an Exhibit to the Company's report on Form S-8, filed on August 18, 2011, and incorporated herein by reference. (Commission File Number 333-171112)                                                               |       |             | 3.10  | Form of 1099 Service Note due 2018 filed as an Exhibit to the Company's report on Form S-8, filed on August 18, 2011, and incorporated herein by reference. (Commission File Number 333-171112)                                                               |
| 3.11         | Indefinite Asset of June 21, 2011, among the Company, the Subsidiary, Operating, and the Trustee filed as an Exhibit to the Company's report on Form S-8, filed on August 18, 2011, and incorporated herein by reference. (Commission File Number 333-171112) |       |             | 3.11  | Indefinite Asset of June 21, 2011, among the Company, the Subsidiary, Operating, and the Trustee filed as an Exhibit to the Company's report on Form S-8, filed on August 18, 2011, and incorporated herein by reference. (Commission File Number 333-171112) |

Figure 20. An example of file from Fintabnet-test [4] dataset. Reading order of images proceeds from left to right and then to the next row. First image shows the original annotation, second image shows the masked image, third image shows the approximated table grid, and fourth image shows the output of TabGuard.

| Statement of Assets      |                  | Year Ended December 31 |                  | 2017             |                  | 2016             |                  | 2015             |  |
|--------------------------|------------------|------------------------|------------------|------------------|------------------|------------------|------------------|------------------|--|
| Accounts receivable      | 1,234,567        | 890,123                | 567,890          | 1,234,567        | 890,123          | 567,890          | 1,234,567        | 890,123          |  |
| Inventory                | 345,678          | 234,567                | 123,456          | 345,678          | 234,567          | 123,456          | 345,678          | 234,567          |  |
| Prepaid expenses         | 123,456          | 98,765                 | 76,543           | 123,456          | 98,765           | 76,543           | 123,456          | 98,765           |  |
| Other assets             | 567,890          | 456,789                | 345,678          | 567,890          | 456,789          | 345,678          | 567,890          | 456,789          |  |
| <b>Total Assets</b>      | <b>2,261,591</b> | <b>1,679,245</b>       | <b>1,013,567</b> | <b>2,261,591</b> | <b>1,679,245</b> | <b>1,013,567</b> | <b>2,261,591</b> | <b>1,679,245</b> |  |
| Accounts payable         | 1,234,567        | 987,654                | 765,432          | 1,234,567        | 987,654          | 765,432          | 1,234,567        | 987,654          |  |
| Accrued liabilities      | 345,678          | 234,567                | 123,456          | 345,678          | 234,567          | 123,456          | 345,678          | 234,567          |  |
| Deferred revenue         | 123,456          | 98,765                 | 76,543           | 123,456          | 98,765           | 76,543           | 123,456          | 98,765           |  |
| Other liabilities        | 567,890          | 456,789                | 345,678          | 567,890          | 456,789          | 345,678          | 567,890          | 456,789          |  |
| <b>Total Liabilities</b> | <b>2,261,591</b> | <b>1,679,245</b>       | <b>1,013,567</b> | <b>2,261,591</b> | <b>1,679,245</b> | <b>1,013,567</b> | <b>2,261,591</b> | <b>1,679,245</b> |  |

Figure 21. An example of file from Fintabnet-test [4] dataset. Reading order of images proceeds from left to right and then to the next row. First image shows the original annotation, second image shows the masked image, third image shows the approximated table grid, and fourth image shows the output of TabGuard.

| Refining & Marketing Operating Statistics By Region   |           | 2017      |           | 2016      |           | 2015      |           |
|-------------------------------------------------------|-----------|-----------|-----------|-----------|-----------|-----------|-----------|
| Refined Petroleum (thousands of barrels per day)      | 1,234,567 | 1,234,567 | 1,234,567 | 1,234,567 | 1,234,567 | 1,234,567 | 1,234,567 |
| Crude oil refined                                     | 456,789   | 456,789   | 456,789   | 456,789   | 456,789   | 456,789   | 456,789   |
| Other refinery and hydrocarbon                        | 777,778   | 777,778   | 777,778   | 777,778   | 777,778   | 777,778   | 777,778   |
| Loss                                                  | (123,456) | (123,456) | (123,456) | (123,456) | (123,456) | (123,456) | (123,456) |
| Net Crude Oil Throughput (million gallons)            | 1,234,567 | 1,234,567 | 1,234,567 | 1,234,567 | 1,234,567 | 1,234,567 | 1,234,567 |
| W-11 Feed Crude Oil Throughput (million gallons)      | 456,789   | 456,789   | 456,789   | 456,789   | 456,789   | 456,789   | 456,789   |
| Refined Product Yields (thousands of barrels per day) | 1,234,567 | 1,234,567 | 1,234,567 | 1,234,567 | 1,234,567 | 1,234,567 | 1,234,567 |
| Gasoline                                              | 345,678   | 345,678   | 345,678   | 345,678   | 345,678   | 345,678   | 345,678   |
| Jet fuel                                              | 234,567   | 234,567   | 234,567   | 234,567   | 234,567   | 234,567   | 234,567   |
| Propane                                               | 123,456   | 123,456   | 123,456   | 123,456   | 123,456   | 123,456   | 123,456   |
| Other products                                        | 510,866   | 510,866   | 510,866   | 510,866   | 510,866   | 510,866   | 510,866   |
| Heavy fuel oil                                        | 12,345    | 12,345    | 12,345    | 12,345    | 12,345    | 12,345    | 12,345    |
| Asphalt                                               | 12,345    | 12,345    | 12,345    | 12,345    | 12,345    | 12,345    | 12,345    |
| Other                                                 | 12,345    | 12,345    | 12,345    | 12,345    | 12,345    | 12,345    | 12,345    |
| Refinery Direct Operating Costs (dollars per barrel)  | \$ 1.47   | \$ 1.47   | \$ 1.47   | \$ 1.47   | \$ 1.47   | \$ 1.47   | \$ 1.47   |
| Refined petroleum and major maintenance               | 1.23      | 1.23      | 1.23      | 1.23      | 1.23      | 1.23      | 1.23      |
| Depreciation and amortization                         | 0.15      | 0.15      | 0.15      | 0.15      | 0.15      | 0.15      | 0.15      |
| Other manufacturing                                   | 0.09      | 0.09      | 0.09      | 0.09      | 0.09      | 0.09      | 0.09      |
| Total                                                 | 1.47      | 1.47      | 1.47      | 1.47      | 1.47      | 1.47      | 1.47      |

Figure 22. An example of file from Fintabnet-test [4] dataset. Reading order of images proceeds from left to right and then to the next row. First image shows the original annotation, second image shows the masked image, third image shows the approximated table grid, and fourth image shows the output of TabGuard.

|                                                                                                      | Page No. |                                                                                                      | Page No. |
|------------------------------------------------------------------------------------------------------|----------|------------------------------------------------------------------------------------------------------|----------|
| Management's Report on Internal Control Over Financial Reporting                                     | 39       | Management's Report on Internal Control Over Financial Reporting                                     | 39       |
| Reports of Independent Registered Public Accounting Firm                                             | 40       | Reports of Independent Registered Public Accounting Firm                                             | 40       |
| Consolidated Statements of Operations for the years ended December 31, 2016, 2015 and 2014           | 42       | Consolidated Statements of Operations for the years ended December 31, 2016, 2015 and 2014           | 42       |
| Consolidated Statements of Comprehensive Income for the years ended December 31, 2016, 2015 and 2014 | 43       | Consolidated Statements of Comprehensive Income for the years ended December 31, 2016, 2015 and 2014 | 43       |
| Consolidated Balance Sheets at December 31, 2016 and 2015                                            | 44       | Consolidated Balance Sheets at December 31, 2016 and 2015                                            | 44       |
| Consolidated Statements of Cash Flows for the years ended December 31, 2016, 2015 and 2014           | 45       | Consolidated Statements of Cash Flows for the years ended December 31, 2016, 2015 and 2014           | 45       |
| Consolidated Statements of Shareholders' Equity for the years ended December 31, 2016, 2015 and 2014 | 46       | Consolidated Statements of Shareholders' Equity for the years ended December 31, 2016, 2015 and 2014 | 46       |
| Notes to Consolidated Financial Statements                                                           | 47       | Notes to Consolidated Financial Statements                                                           | 47       |
| Selected Financial Data (Unaudited)                                                                  | 73       | Selected Financial Data (Unaudited)                                                                  | 73       |
| Quarterly Data and Market Price Information (Unaudited)                                              | 74       | Quarterly Data and Market Price Information (Unaudited)                                              | 74       |

Figure 23. An example of file from Fintabnet-test [4] dataset. Reading order of images proceeds from left to right and then to the next row. First image shows the original annotation, second image shows the masked image, third image shows the approximated table grid, and fourth image shows the output of TabGuard.

| Millions of dollars except per share                       | Year ended December 31 |           |           |           |           |
|------------------------------------------------------------|------------------------|-----------|-----------|-----------|-----------|
|                                                            | 2017                   | 2016      | 2015      | 2014      | 2013      |
| Revenue                                                    | \$ 20,620              | \$ 15,887 | \$ 23,633 | \$ 32,870 | \$ 29,402 |
| Operating income (loss)                                    | 1,362                  | (6,778)   | (165)     | 5,097     | 3,138     |
| Income (loss) from continuing operations                   | (449)                  | (5,767)   | (662)     | 3,437     | 2,116     |
| Basic income (loss) per share from continuing operations   | (0.51)                 | (6.69)    | (0.78)    | 4.05      | 2.35      |
| Diluted income (loss) per share from continuing operations | (0.51)                 | (6.69)    | (0.78)    | 4.03      | 2.33      |
| Cash dividends per share                                   | 0.72                   | 0.72      | 0.72      | 0.63      | 0.525     |
| Net working capital                                        | 5,915                  | 7,654     | 14,733    | 8,781     | 8,678     |
| Total assets                                               | 25,085                 | 27,000    | 36,942    | 32,165    | 29,223    |
| Long-term debt                                             | 10,430                 | 12,214    | 14,687    | 7,765     | 7,816     |
| Total shareholders' equity                                 | 8,349                  | 9,448     | 15,495    | 16,298    | 13,615    |
| Capital expenditures                                       | 1,373                  | 798       | 2,184     | 3,283     | 2,934     |

Figure 24. An example of file from Fintabnet-test [4] dataset. Reading order of images proceeds from left to right and then to the next row. First image shows the original annotation, second image shows the masked image, third image shows the approximated table grid, and fourth image shows the output of TabGuard.

| Millions of dollars                                          | Effect on                      |                                                 |
|--------------------------------------------------------------|--------------------------------|-------------------------------------------------|
|                                                              | Pretax Pension Expense in 2009 | Pension Benefit Obligation at December 31, 2009 |
| 25-basis-point decrease in discount rate                     | \$ 1                           | \$ 35                                           |
| 25-basis-point increase in discount rate                     | \$ (1)                         | \$ (33)                                         |
| 25-basis-point decrease in expected long-term rate of return | \$ 1                           | NA                                              |
| 25-basis-point increase in expected long-term rate of return | \$ (1)                         | NA                                              |

Figure 25. An example of file from Fintabnet-test [4] dataset, where our model failed to capture near accurate structure. Reading order of images proceeds from left to right and then to the next row. First image shows the original annotation, second image shows the masked image, third image shows the approximated table grid, and fourth image shows the output of TabGuard.

| Millions of dollars                                              | Company Shareholders' Equity |                                        |                |                   |                                               | Total |                                                      |
|------------------------------------------------------------------|------------------------------|----------------------------------------|----------------|-------------------|-----------------------------------------------|-------|------------------------------------------------------|
|                                                                  | Common Shares                | Paid-in Capital in Excess of Par Value | Treasury Stock | Retained Earnings | Accumulated Other Comprehensive Income (Loss) |       | Noncontrolling Interest in Consolidated Subsidiaries |
| Balance at December 31, 2006                                     | \$ 2,650                     | \$ 1,689                               | \$ (1,577)     | \$ 5,051          | \$ (437)                                      | \$ 69 | \$ 7,445                                             |
| Adoption of new accounting standard                              | -                            | 63                                     | -              | (43)              | -                                             | -     | 20                                                   |
| Adjusted Balance at December 31, 2006                            | \$ 2,650                     | \$ 1,752                               | \$ (1,577)     | \$ 5,008          | \$ (437)                                      | \$ 69 | \$ 7,465                                             |
| Cash dividends paid                                              | -                            | -                                      | -              | (14)              | -                                             | -     | (14)                                                 |
| Stock plans                                                      | 7                            | 23                                     | 130            | -                 | -                                             | -     | 160                                                  |
| Common shares purchased                                          | -                            | -                                      | (1,374)        | -                 | -                                             | -     | (1,374)                                              |
| Tax benefit from exercise of options and restricted stock        | -                            | 29                                     | -              | -                 | -                                             | -     | 29                                                   |
| Distributions to noncontrolling interest holders                 | -                            | -                                      | -              | -                 | -                                             | (5)   | (5)                                                  |
| Other transactions with shareholders                             | -                            | -                                      | -              | (4)               | -                                             | (21)  | (25)                                                 |
| Total dividends and other transactions with shareholders         | 7                            | 52                                     | (1,244)        | (18)              | -                                             | (26)  | (1,529)                                              |
| Shares exchanged in KBR, Inc. exchange offer                     | -                            | -                                      | (2,809)        | -                 | -                                             | -     | (2,809)                                              |
| Adoption of new accounting standard                              | -                            | -                                      | -              | (30)              | -                                             | -     | (30)                                                 |
| Comprehensive income (loss):                                     |                              |                                        |                |                   |                                               |       |                                                      |
| Net income                                                       | -                            | -                                      | -              | 3,486             | -                                             | 50    | 3,536                                                |
| Other comprehensive income (loss):                               |                              |                                        |                |                   |                                               |       |                                                      |
| Cumulative translation adjustment                                | -                            | -                                      | -              | -                 | 1                                             | -     | 1                                                    |
| Realization of translation gains included in net income          | -                            | -                                      | -              | -                 | (24)                                          | -     | (24)                                                 |
| Defined benefit and other postretirement plans adjustments:      |                              |                                        |                |                   |                                               |       |                                                      |
| Prior service cost:                                              |                              |                                        |                |                   |                                               |       |                                                      |
| Plan amendment                                                   | -                            | -                                      | -              | (2)               | -                                             | -     | (2)                                                  |
| Settlements/curtailments                                         | -                            | -                                      | -              | 5                 | -                                             | -     | 5                                                    |
| Actuarial gain (loss):                                           |                              |                                        |                |                   |                                               |       |                                                      |
| Net gain                                                         | -                            | -                                      | -              | 105               | -                                             | -     | 105                                                  |
| Amortization of net loss                                         | -                            | -                                      | -              | 14                | -                                             | -     | 14                                                   |
| Settlements/curtailments                                         | -                            | -                                      | -              | 7                 | -                                             | -     | 7                                                    |
| Tax effect on defined benefit and postretirement plans           | -                            | -                                      | -              | (45)              | -                                             | -     | (45)                                                 |
| KBR, Inc. separation                                             | -                            | -                                      | -              | 271               | -                                             | -     | 271                                                  |
| Defined benefit and other postretirement plans, net              | -                            | -                                      | -              | 355               | -                                             | -     | 355                                                  |
| Net unrealized gains on investments, net of tax provision of \$0 | -                            | -                                      | -              | -                 | 1                                             | -     | 1                                                    |
| Total comprehensive income                                       | -                            | -                                      | -              | 3,486             | 333                                           | 50    | 3,869                                                |
| Balance at December 31, 2007                                     | \$ 2,657                     | \$ 1,804                               | \$ (5,630)     | \$ 8,146          | \$ (104)                                      | \$ 93 | \$ 6,966                                             |

| Millions of dollars                                              | Company Shareholders' Equity |                                        |                |                   |                                               | Total |                                                      |
|------------------------------------------------------------------|------------------------------|----------------------------------------|----------------|-------------------|-----------------------------------------------|-------|------------------------------------------------------|
|                                                                  | Common Shares                | Paid-in Capital in Excess of Par Value | Treasury Stock | Retained Earnings | Accumulated Other Comprehensive Income (Loss) |       | Noncontrolling Interest in Consolidated Subsidiaries |
| Balance at December 31, 2006                                     | \$ 2,650                     | \$ 1,689                               | \$ (1,577)     | \$ 5,051          | \$ (437)                                      | \$ 69 | \$ 7,445                                             |
| Adoption of new accounting standard                              | -                            | 63                                     | -              | (43)              | -                                             | -     | 20                                                   |
| Adjusted Balance at December 31, 2006                            | \$ 2,650                     | \$ 1,752                               | \$ (1,577)     | \$ 5,008          | \$ (437)                                      | \$ 69 | \$ 7,465                                             |
| Cash dividends paid                                              | -                            | -                                      | -              | (14)              | -                                             | -     | (14)                                                 |
| Stock plans                                                      | 7                            | 23                                     | 130            | -                 | -                                             | -     | 160                                                  |
| Common shares purchased                                          | -                            | -                                      | (1,374)        | -                 | -                                             | -     | (1,374)                                              |
| Tax benefit from exercise of options and restricted stock        | -                            | 29                                     | -              | -                 | -                                             | -     | 29                                                   |
| Distributions to noncontrolling interest holders                 | -                            | -                                      | -              | -                 | -                                             | (5)   | (5)                                                  |
| Other transactions with shareholders                             | -                            | -                                      | -              | (4)               | -                                             | (21)  | (25)                                                 |
| Total dividends and other transactions with shareholders         | 7                            | 52                                     | (1,244)        | (18)              | -                                             | (26)  | (1,529)                                              |
| Shares exchanged in KBR, Inc. exchange offer                     | -                            | -                                      | (2,809)        | -                 | -                                             | -     | (2,809)                                              |
| Adoption of new accounting standard                              | -                            | -                                      | -              | (30)              | -                                             | -     | (30)                                                 |
| Comprehensive income (loss):                                     |                              |                                        |                |                   |                                               |       |                                                      |
| Net income                                                       | -                            | -                                      | -              | 3,486             | -                                             | 50    | 3,536                                                |
| Other comprehensive income (loss):                               |                              |                                        |                |                   |                                               |       |                                                      |
| Cumulative translation adjustment                                | -                            | -                                      | -              | -                 | 1                                             | -     | 1                                                    |
| Realization of translation gains included in net income          | -                            | -                                      | -              | -                 | (24)                                          | -     | (24)                                                 |
| Defined benefit and other postretirement plans adjustments:      |                              |                                        |                |                   |                                               |       |                                                      |
| Prior service cost:                                              |                              |                                        |                |                   |                                               |       |                                                      |
| Plan amendment                                                   | -                            | -                                      | -              | (2)               | -                                             | -     | (2)                                                  |
| Settlements/curtailments                                         | -                            | -                                      | -              | 5                 | -                                             | -     | 5                                                    |
| Actuarial gain (loss):                                           |                              |                                        |                |                   |                                               |       |                                                      |
| Net gain                                                         | -                            | -                                      | -              | 105               | -                                             | -     | 105                                                  |
| Amortization of net loss                                         | -                            | -                                      | -              | 14                | -                                             | -     | 14                                                   |
| Settlements/curtailments                                         | -                            | -                                      | -              | 7                 | -                                             | -     | 7                                                    |
| Tax effect on defined benefit and postretirement plans           | -                            | -                                      | -              | (45)              | -                                             | -     | (45)                                                 |
| KBR, Inc. separation                                             | -                            | -                                      | -              | 271               | -                                             | -     | 271                                                  |
| Defined benefit and other postretirement plans, net              | -                            | -                                      | -              | 355               | -                                             | -     | 355                                                  |
| Net unrealized gains on investments, net of tax provision of \$0 | -                            | -                                      | -              | -                 | 1                                             | -     | 1                                                    |
| Total comprehensive income                                       | -                            | -                                      | -              | 3,486             | 333                                           | 50    | 3,869                                                |
| Balance at December 31, 2007                                     | \$ 2,657                     | \$ 1,804                               | \$ (5,630)     | \$ 8,146          | \$ (104)                                      | \$ 93 | \$ 6,966                                             |

Figure 26. An example of file from Fintabnet-test [4] dataset, where our model failed to capture near accurate structure. Reading order of images proceeds from left to right and then to the next row. First image shows the original annotation, second image shows the masked image, third image shows the approximated table grid, and fourth image shows the output of TabGuard.

| Millions of dollars                        | Years ended December 31 |          |          | Total |
|--------------------------------------------|-------------------------|----------|----------|-------|
|                                            | 2004                    | 2003     | 2002     |       |
| Depreciation, depletion, and amortization: |                         |          |          |       |
| Production Optimization                    | \$ 115                  | \$ 104   | \$ 99    |       |
| Fluid Systems                              | 60                      | 50       | 48       |       |
| Drilling and Formation Evaluation          | 115                     | 144      | 137      |       |
| Digital and Consulting Solutions           | 75                      | 77       | 112      |       |
| Shared Energy Services                     | 91                      | 92       | 79       |       |
| Total Energy Services Group                | 456                     | 467      | 475      |       |
| Government and Infrastructure              | 27                      | 22       | 11       |       |
| Energy and Chemicals                       | 11                      | 16       | 17       |       |
| Shared KBR                                 | 15                      | 12       | 1        |       |
| Total KBR                                  | 53                      | 50       | 29       |       |
| General corporate                          | -                       | 1        | 1        |       |
| Total                                      | \$ 509                  | \$ 518   | \$ 505   |       |
| Bad assets:                                |                         |          |          |       |
| Production Optimization                    | \$ 1,754                | \$ 1,659 | \$ 1,444 |       |
| Fluid Systems                              | 1,045                   | 1,030    | 890      |       |
| Drilling and Formation Evaluation          | 960                     | 1,074    | 1,163    |       |
| Digital and Consulting Solutions           | 768                     | 794      | 1,320    |       |
| Shared Energy Services                     | 1,021                   | 1,240    | 1,187    |       |
| Total Energy Services Group                | 5,548                   | 5,797    | 5,944    |       |
| Government and Infrastructure              | 3,309                   | 2,758    | 784      |       |
| Energy and Chemicals                       | 1,656                   | 2,078    | 2,055    |       |
| Shared KBR                                 | 198                     | 246      | 265      |       |
| Total KBR                                  | 5,163                   | 5,082    | 3,104    |       |
| General corporate                          | 5,085                   | 4,620    | 3,796    |       |
| Total                                      | \$15,796                | \$15,499 | \$12,844 |       |

Figure 27. An example of file from Fintabnet-test [4] dataset, where our model failed to capture near accurate structure. Reading order of images proceeds from left to right and then to the next row. First image shows the original annotation, second image shows the masked image, third image shows the approximated table grid, and fourth image shows the output of TabGuard.

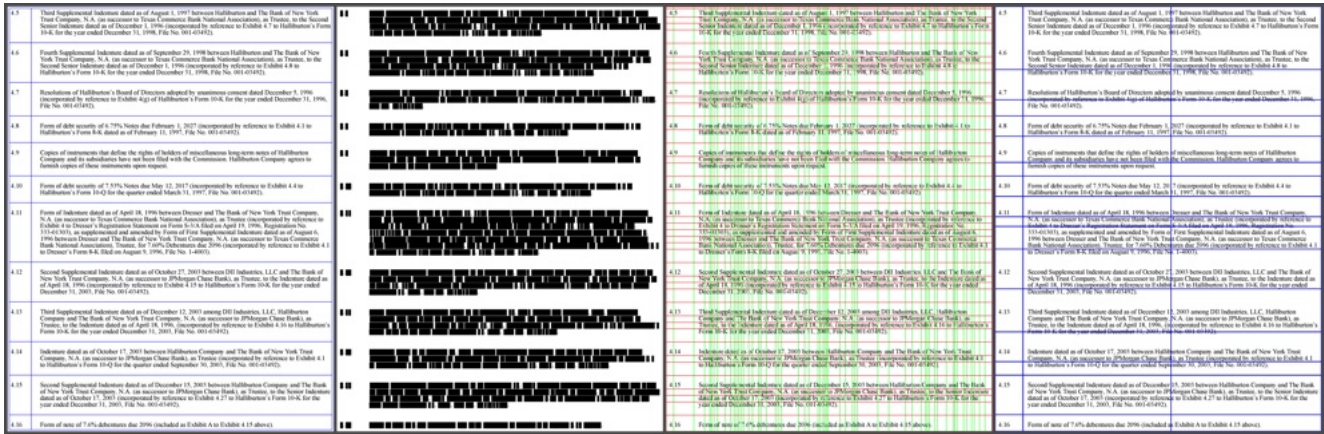

Figure 28. An example of file from Fintabnet-test [4] dataset, where our model failed to capture near accurate structure. Reading order of images proceeds from left to right and then to the next row. First image shows the original annotation, second image shows the masked image, third image shows the approximated table grid, and fourth image shows the output of TabGuard.

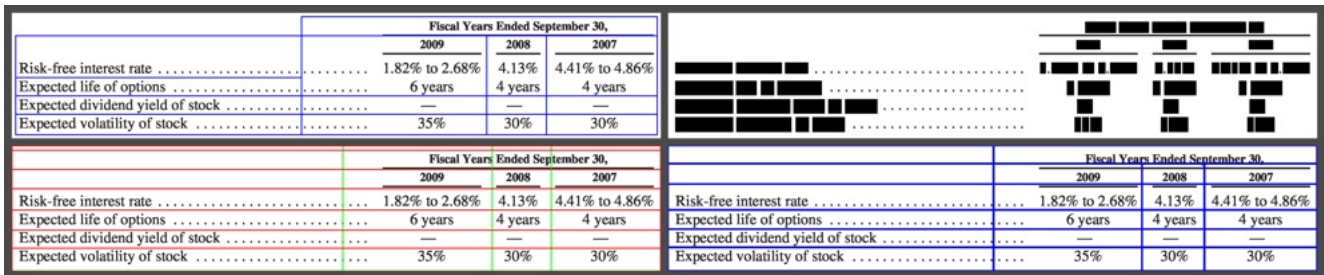

Figure 29. An example of file from Fintabnet-test [4] dataset which is incorrectly annotated. Reading order of images proceeds from left to right and then to the next row. First image shows the original annotation, second image shows the masked image, third image shows the approximated table grid, and fourth image shows the output of TabGuard.

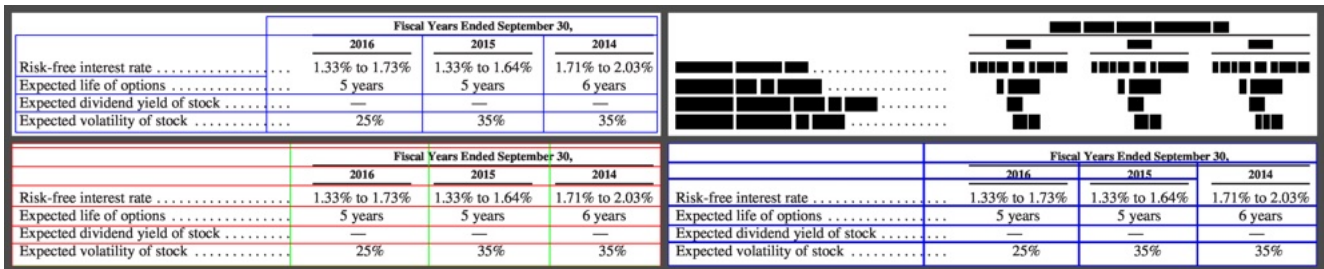

Figure 30. An example of file from Fintabnet-test [4] dataset which is incorrectly annotated. Reading order of images proceeds from left to right and then to the next row. First image shows the original annotation, second image shows the masked image, third image shows the approximated table grid, and fourth image shows the output of TabGuard.

| Location                                 | Products Manufactured | Segment                | Approximate Area (Sq. Feet) |
|------------------------------------------|-----------------------|------------------------|-----------------------------|
| Mississauga, Canada <sup>(6)</sup>       | ---                   | Consumer International | 123,000                     |
| Folkestone, England <sup>(7)</sup>       | ---                   | Consumer International | 78,500                      |
| Revel, France                            | ---                   | Consumer International | 35,500                      |
| Mexico City, Mexico                      | ---                   | Consumer International | 27,500                      |
| Sydney, Australia                        | ---                   | Consumer International | 24,900                      |
| Feira de Santana, Bahia, Brazil          | ---                   | SPD                    | 21,700                      |
| Langley, British Columbia <sup>(8)</sup> | ---                   | Consumer International | 6,300                       |
| <b>Offices</b>                           |                       |                        |                             |
| Levallois, France                        | ---                   | Consumer International | 21,600                      |
| Mississauga, Canada                      | ---                   | Consumer International | 17,000                      |
| Folkestone, England <sup>(9)</sup>       | ---                   | Consumer International | 11,000                      |
| Dover, England                           | ---                   | Consumer International | 9,400                       |

  

| Location                                 | Products Manufactured | Segment                | Approximate Area (Sq. Feet) |
|------------------------------------------|-----------------------|------------------------|-----------------------------|
| Mississauga, Canada <sup>(6)</sup>       | ---                   | Consumer International | 123,000                     |
| Folkestone, England <sup>(7)</sup>       | ---                   | Consumer International | 78,500                      |
| Revel, France                            | ---                   | Consumer International | 35,500                      |
| Mexico City, Mexico                      | ---                   | Consumer International | 27,500                      |
| Sydney, Australia                        | ---                   | Consumer International | 24,900                      |
| Feira de Santana, Bahia, Brazil          | ---                   | SPD                    | 21,700                      |
| Langley, British Columbia <sup>(8)</sup> | ---                   | Consumer International | 6,300                       |
| <b>Offices</b>                           |                       |                        |                             |
| Levallois, France                        | ---                   | Consumer International | 21,600                      |
| Mississauga, Canada                      | ---                   | Consumer International | 17,000                      |
| Folkestone, England <sup>(9)</sup>       | ---                   | Consumer International | 11,000                      |
| Dover, England                           | ---                   | Consumer International | 9,400                       |

  

| Location                                 | Products Manufactured | Segment                | Approximate Area (Sq. Feet) |
|------------------------------------------|-----------------------|------------------------|-----------------------------|
| Mississauga, Canada <sup>(6)</sup>       | ---                   | Consumer International | 123,000                     |
| Folkestone, England <sup>(7)</sup>       | ---                   | Consumer International | 78,500                      |
| Revel, France                            | ---                   | Consumer International | 35,500                      |
| Mexico City, Mexico                      | ---                   | Consumer International | 27,500                      |
| Sydney, Australia                        | ---                   | Consumer International | 24,900                      |
| Feira de Santana, Bahia, Brazil          | ---                   | SPD                    | 21,700                      |
| Langley, British Columbia <sup>(8)</sup> | ---                   | Consumer International | 6,300                       |
| <b>Offices</b>                           |                       |                        |                             |
| Levallois, France                        | ---                   | Consumer International | 21,600                      |
| Mississauga, Canada                      | ---                   | Consumer International | 17,000                      |
| Folkestone, England <sup>(9)</sup>       | ---                   | Consumer International | 11,000                      |
| Dover, England                           | ---                   | Consumer International | 9,400                       |

Figure 31. An example of file from Fintabnet-test [4] dataset which is incorrectly annotated. Reading order of images proceeds from left to right and then to the next row. First image shows the original annotation, second image shows the masked image, third image shows the approximated table grid, and fourth image shows the output of TabGuard.
